# Supplementary material for: Acacia Changes Microbial Indicators and Increases C and N in Soil Organic Fractions in Intercropped Eucalyptus Plantations
Source: PubMed Central journal article supplement (PMC5893836; doi:10.3389/fmicb.2018.00655), 2018-04-04
Supplement: Image1.pdf [file Image1.pdf]

## Supplementary Material

### *Acacia* changes microbial indicators and increases C and N in soil organic fractions in intercropped *Eucalyptus* plantations

Arthur P.A. Pereira<sup>1\*</sup>, Maurício R.G. Zagatto<sup>1</sup>, Carolina B. Brandani<sup>2</sup>, Denise de L. Mescolotti<sup>1</sup>, Simone Raposo Cotta<sup>1</sup>, José L.M. Gonçalves<sup>2</sup>, Elke J.B.N. Cardoso<sup>1\*</sup>

<sup>1</sup>Soil Microbiology Laboratory, “Luiz de Queiroz” College of Agriculture - University of São Paulo, Department of Soil Science, Piracicaba, Brazil

<sup>2</sup>“Luiz de Queiroz” College of Agriculture - University of São Paulo, Department of Forest Sciences, Piracicaba, Brazil

\*Corresponding author: Elke JBN Cardoso, Email: [ejbncard@usp.br](mailto:ejbncard@usp.br); Arthur PA Pereira, Email:

[arthur.prudencio@usp.br](mailto:arthur.prudencio@usp.br)

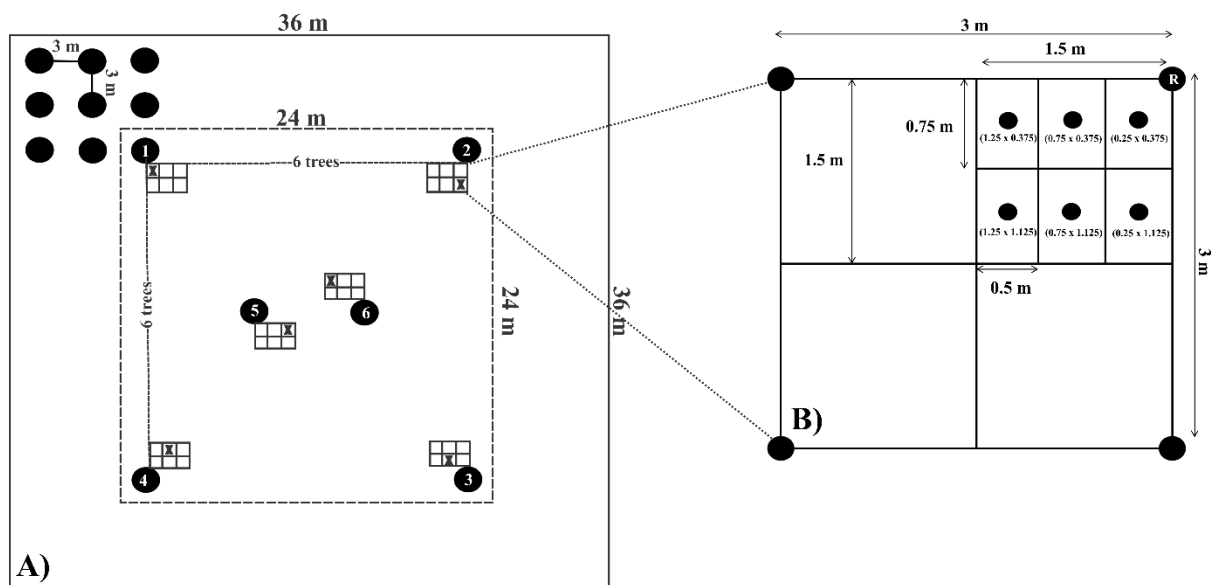

**Supplementary Figure S1.** Soil and litter sampling based on Voronoi grids. A) total plot area (36 x 36 m), the useful plot (24 x 24 m) and spacing between plants (3 x 3 m). Numbers 1 to 6 indicate the trees selected for sampling and "X" indicates the collection points at each tree; B) "R" represents the reference tree and the six rectangles represent the dimensions of each sampling point.
