# Supplementary material for: Acacia Changes Microbial Indicators and Increases C and N in Soil Organic Fractions in Intercropped Eucalyptus Plantations
Source: PubMed Central journal article supplement (PMC5893836; doi:10.3389/fmicb.2018.00655), 2018-04-04
Supplement: Image2.pdf [file Image2.pdf]

## *Supplementary Material*

### ***Acacia* changes microbial indicators and increases C and N in soil organic fractions in intercropped *Eucalyptus* plantations**

**Arthur P.A. Pereira<sup>1\*</sup>, Maurício R.G. Zagatto<sup>1</sup>, Carolina B. Brandani<sup>2</sup>, Denise de L. Mescolotti<sup>1</sup>, Simone Raposo Cotta<sup>1</sup>, José L.M. Gonçalves<sup>2</sup>, Elke J.B.N. Cardoso<sup>1\*</sup>**

<sup>1</sup>Soil Microbiology Laboratory, “Luiz de Queiroz” College of Agriculture - University of São Paulo, Department of Soil Science, Piracicaba, Brazil

<sup>2</sup>“Luiz de Queiroz” College of Agriculture - University of São Paulo, Department of Forest Sciences, Piracicaba, Brazil

**\*Corresponding author:** Elke JBN Cardoso, Email: [ejbncard@usp.br](mailto:ejbncard@usp.br); Arthur PA Pereira, Email:

[arthur.prudencio@usp.br](mailto:arthur.prudencio@usp.br)

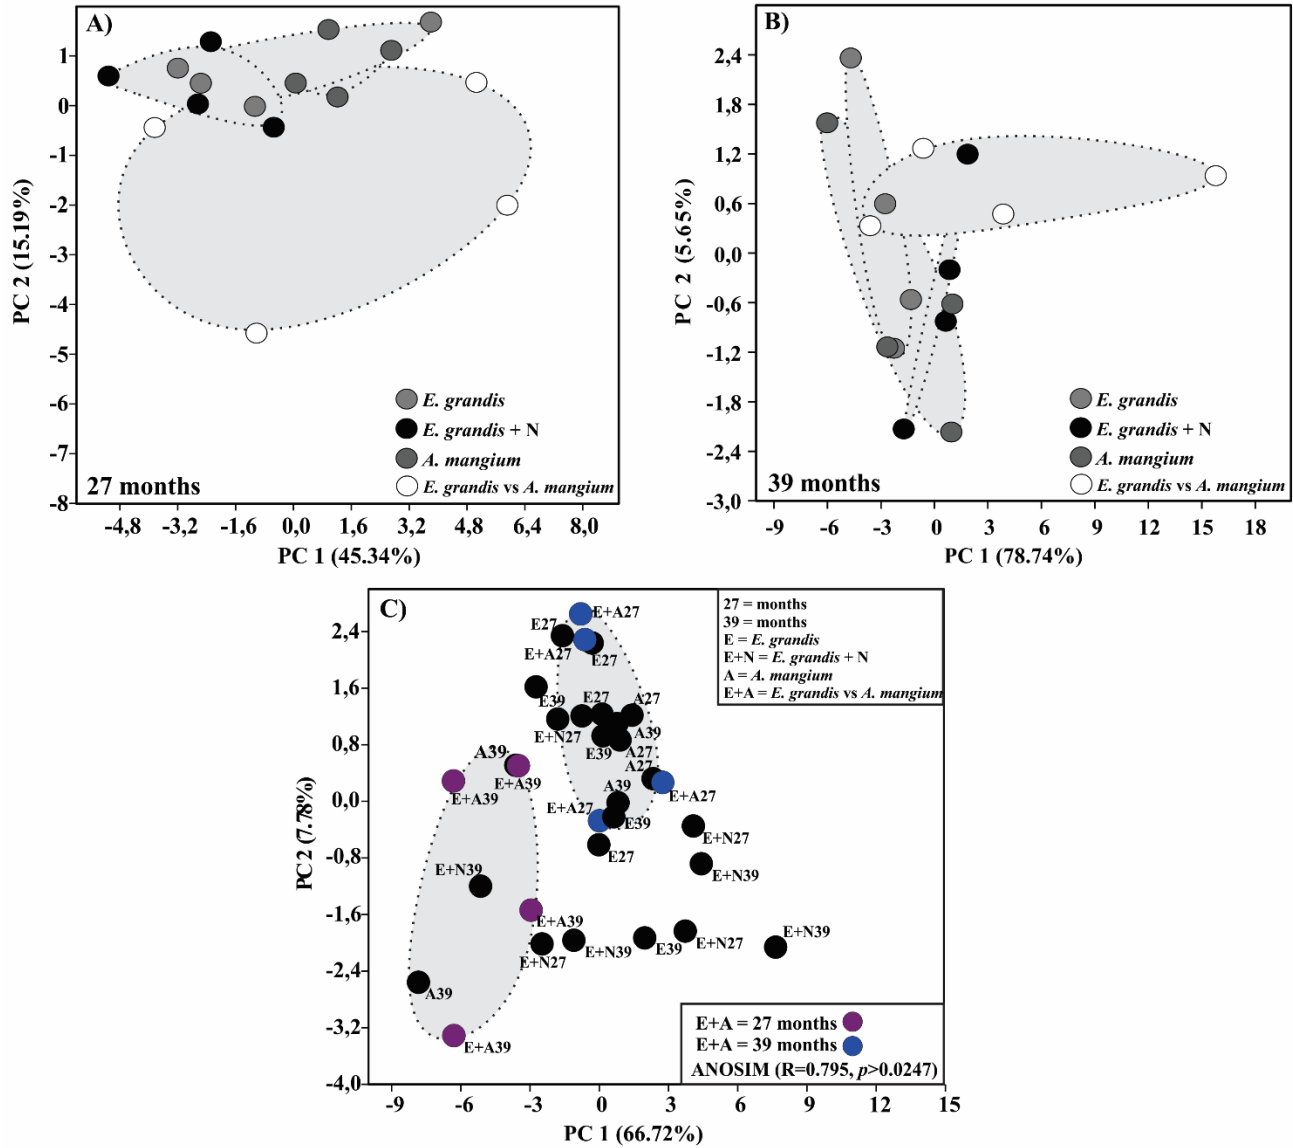

**Supplementary Figure S2.** Principal Coordinates Analysis (PCoA) based on the metabolic profile degradation of the soil microbial community accessed by Biolog EcoPlates in pure and mixed *E. grandis* and *A. mangium* plantations. A) 27 and B) 39 months after planting, and C) total profile.
