# Supplementary material for: Acacia Changes Microbial Indicators and Increases C and N in Soil Organic Fractions in Intercropped Eucalyptus Plantations
Source: PubMed Central journal article supplement (PMC5893836; doi:10.3389/fmicb.2018.00655), 2018-04-04
Supplement: Image3.pdf [file Image3.pdf]

## Supplementary Material

### *Acacia* changes microbial indicators and increases C and N in soil organic fractions in intercropped *Eucalyptus* plantations

Arthur P.A. Pereira<sup>1\*</sup>, Maurício R.G. Zagatto<sup>1</sup>, Carolina B. Brandani<sup>2</sup>, Denise de L. Mescolotti<sup>1</sup>, Simone Raposo Cotta<sup>1</sup>, José L.M. Gonçalves<sup>2</sup>, Elke J.B.N. Cardoso<sup>1\*</sup>

<sup>1</sup>Soil Microbiology Laboratory, “Luiz de Queiroz” College of Agriculture - University of São Paulo, Department of Soil Science, Piracicaba, Brazil

<sup>2</sup>“Luiz de Queiroz” College of Agriculture - University of São Paulo, Department of Forest Sciences, Piracicaba, Brazil

\*Corresponding author: Elke JBN Cardoso, Email: [ejbncard@usp.br](mailto:ejbncard@usp.br); Arthur PA Pereira, Email:

[arthur.prudencio@usp.br](mailto:arthur.prudencio@usp.br)

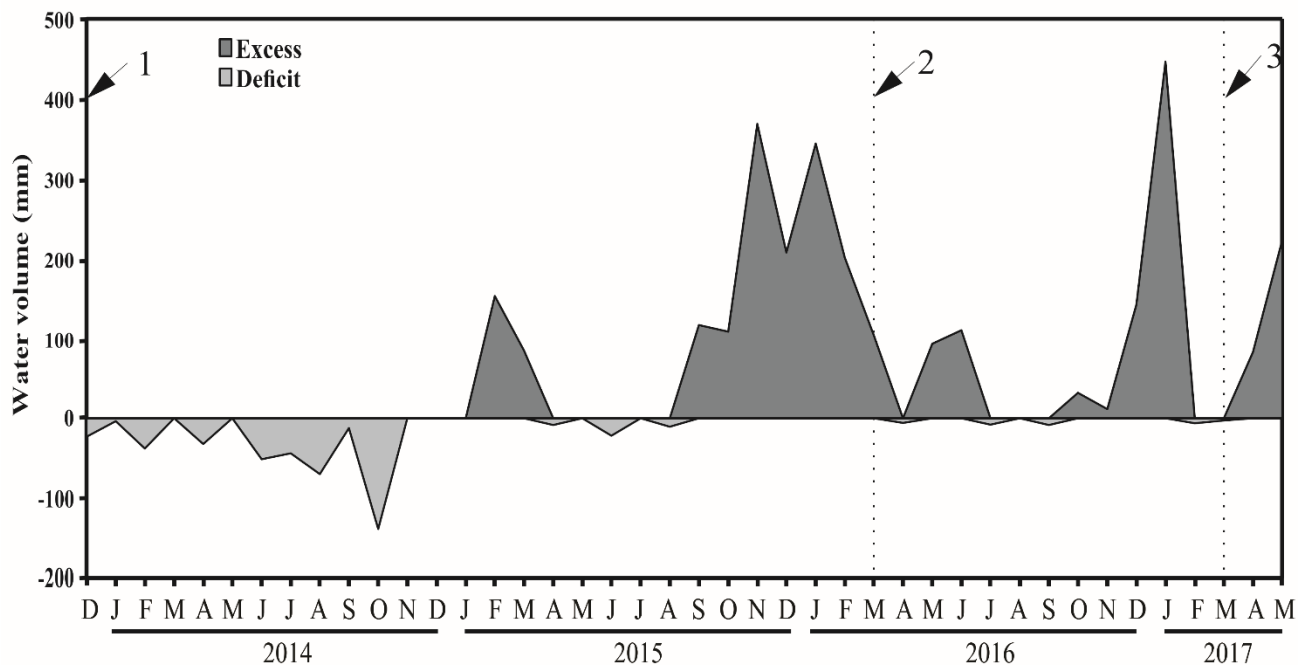

**Supplementary Figure S3.** Monthly sequential water balance by the method proposed by Thornthwaite and Mather (1955) during the experiment (arrow 1, December 2013) from 2014 to 2017. Arrows 2 and 3 represent the 1<sup>st</sup> (27 months) and 2<sup>nd</sup> (39 months) sampling period. Soil water storage capacity = 280 mm.
