# Supplementary material for: Acacia Changes Microbial Indicators and Increases C and N in Soil Organic Fractions in Intercropped Eucalyptus Plantations
Source: PubMed Central journal article supplement (PMC5893836; doi:10.3389/fmicb.2018.00655), 2018-04-04
Supplement: Image4.pdf [file Image4.pdf]

## Supplementary Material

### *Acacia* changes microbial indicators and increases C and N in soil organic fractions in intercropped *Eucalyptus* plantations

Arthur P.A. Pereira<sup>1\*</sup>, Maurício R.G. Zagatto<sup>1</sup>, Carolina B. Brandani<sup>2</sup>, Denise de L. Mescolotti<sup>1</sup>, Simone Raposo Cotta<sup>1</sup>, José L.M. Gonçalves<sup>2</sup>, Elke J.B.N. Cardoso<sup>1\*</sup>

<sup>1</sup>Soil Microbiology Laboratory, “Luiz de Queiroz” College of Agriculture - University of São Paulo, Department of Soil Science, Piracicaba, Brazil

<sup>2</sup>“Luiz de Queiroz” College of Agriculture - University of São Paulo, Department of Forest Sciences, Piracicaba, Brazil

\*Corresponding author: Elke JBN Cardoso, Email: [ejbncard@usp.br](mailto:ejbncard@usp.br); Arthur PA Pereira, Email: [arthur.prudencio@usp.br](mailto:arthur.prudencio@usp.br)

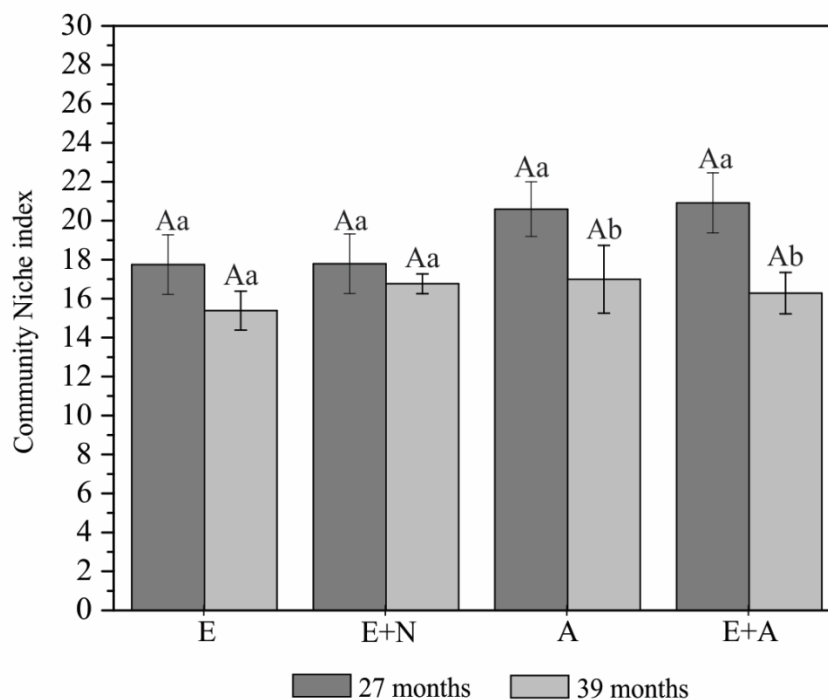

**Supplementary Figure S4.** Community Niche index based on the metabolic profile degradation by the soil microbial community in pure and mixed *E. grandis* and *A. mangium* plantations. (E) *E. grandis*, (E+N) *E. grandis* with N fertilization, (A) *A. mangium* and (E+A) mixed plantation between *E. grandis* and *A. mangium* at 27 and 39 months after planting. Means followed by the same letter do not differ by Tukey’s test at a significance level of 5%. Upper case letters compare treatments within each period and lower-case letter compare the periods within each treatment. Error bars indicate standard deviation;  $n = 4$ .
